# Supplementary material for: Integrated multi-omics profiling reveals neutrophil extracellular traps potentiate Aortic dissection progression
Source: PubMed Central journal article supplement — Nat Commun. 2024 Dec 30;15:10736. doi: 10.1038/s41467-024-55038-8 (PMC11686284; doi:10.1038/s41467-024-55038-8), 2024-12-30
Supplement: 41467_2024_55038_MOESM1_ESM.pdf [file 41467_2024_55038_MOESM1_ESM.pdf]

# SFigure 1

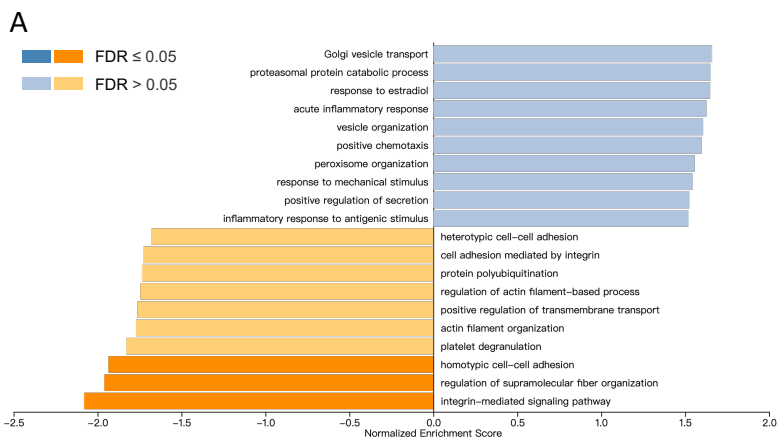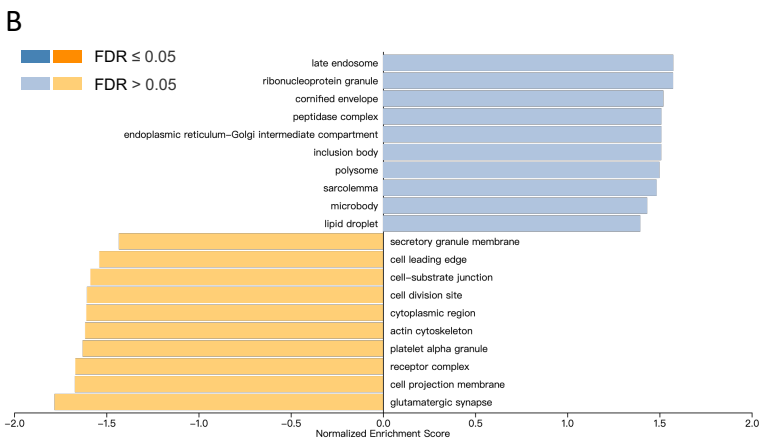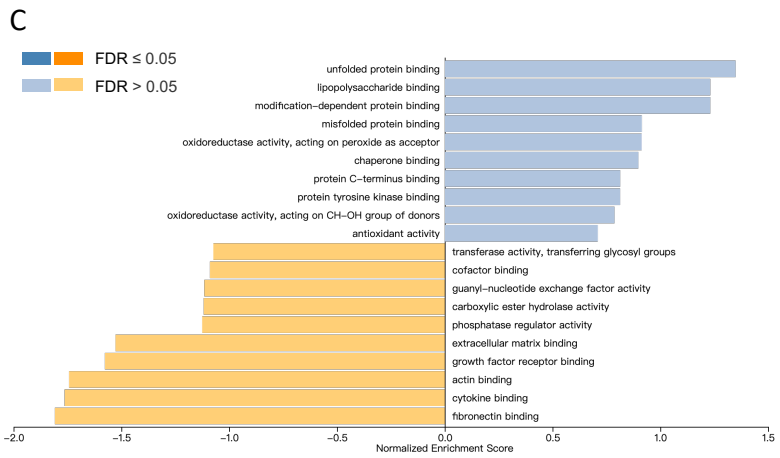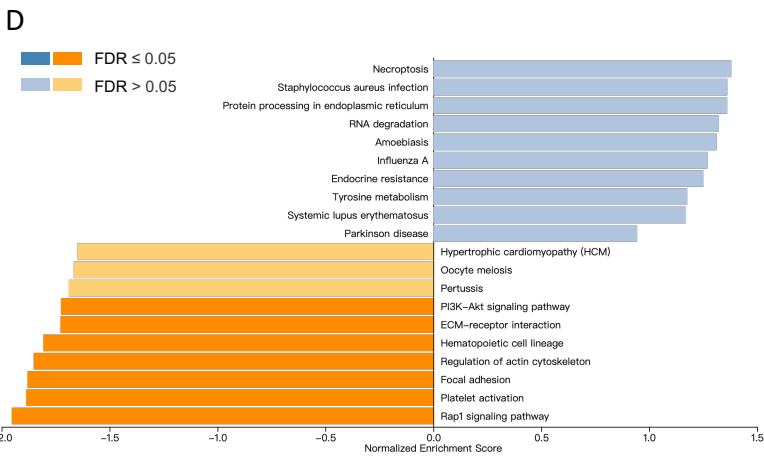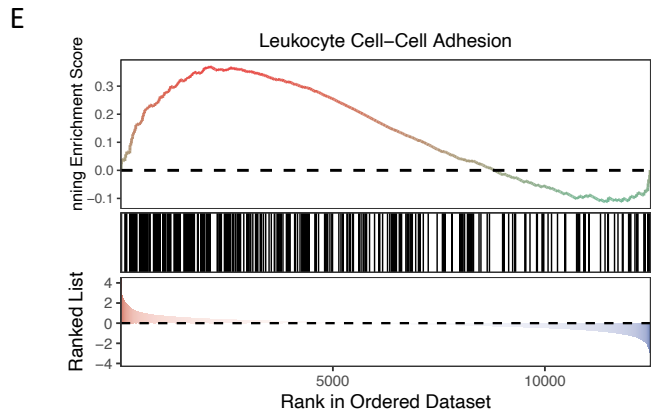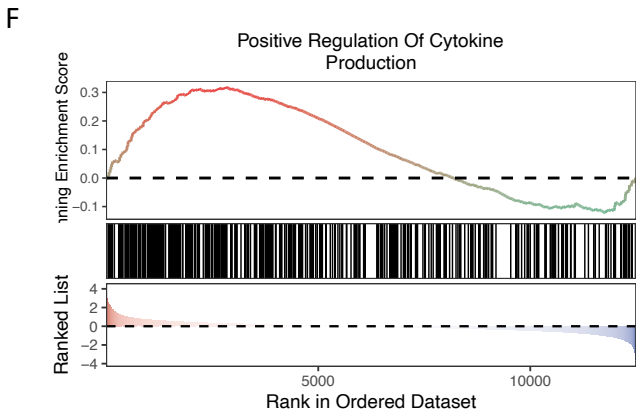

1 **Supplementary Figure 1. Systemic inflammation is elevated in peripheral blood from**  
2 **patients with AD.** (A) GSEA of biological processes of differently expressed proteins. (B)  
3 GSEA of cellular component in differently expressed proteins. (C) GSEA of molecular  
4 function in differently expressed proteins. (D) KEGG analysis in differently expressed  
5 proteins. A positive enrichment score indicates association with AD. (E-F) GSEA showed  
6 the hallmark pathways enriched in the patients with AD including leukocyte cell-cell  
7 adhesion, and positive regulation of cytokine production. **KEGG:** Kyoto encyclopedia of  
8 genes and genomes; **GSEA:** Gene set enrichment analysis.

9

# SFigure 2

A

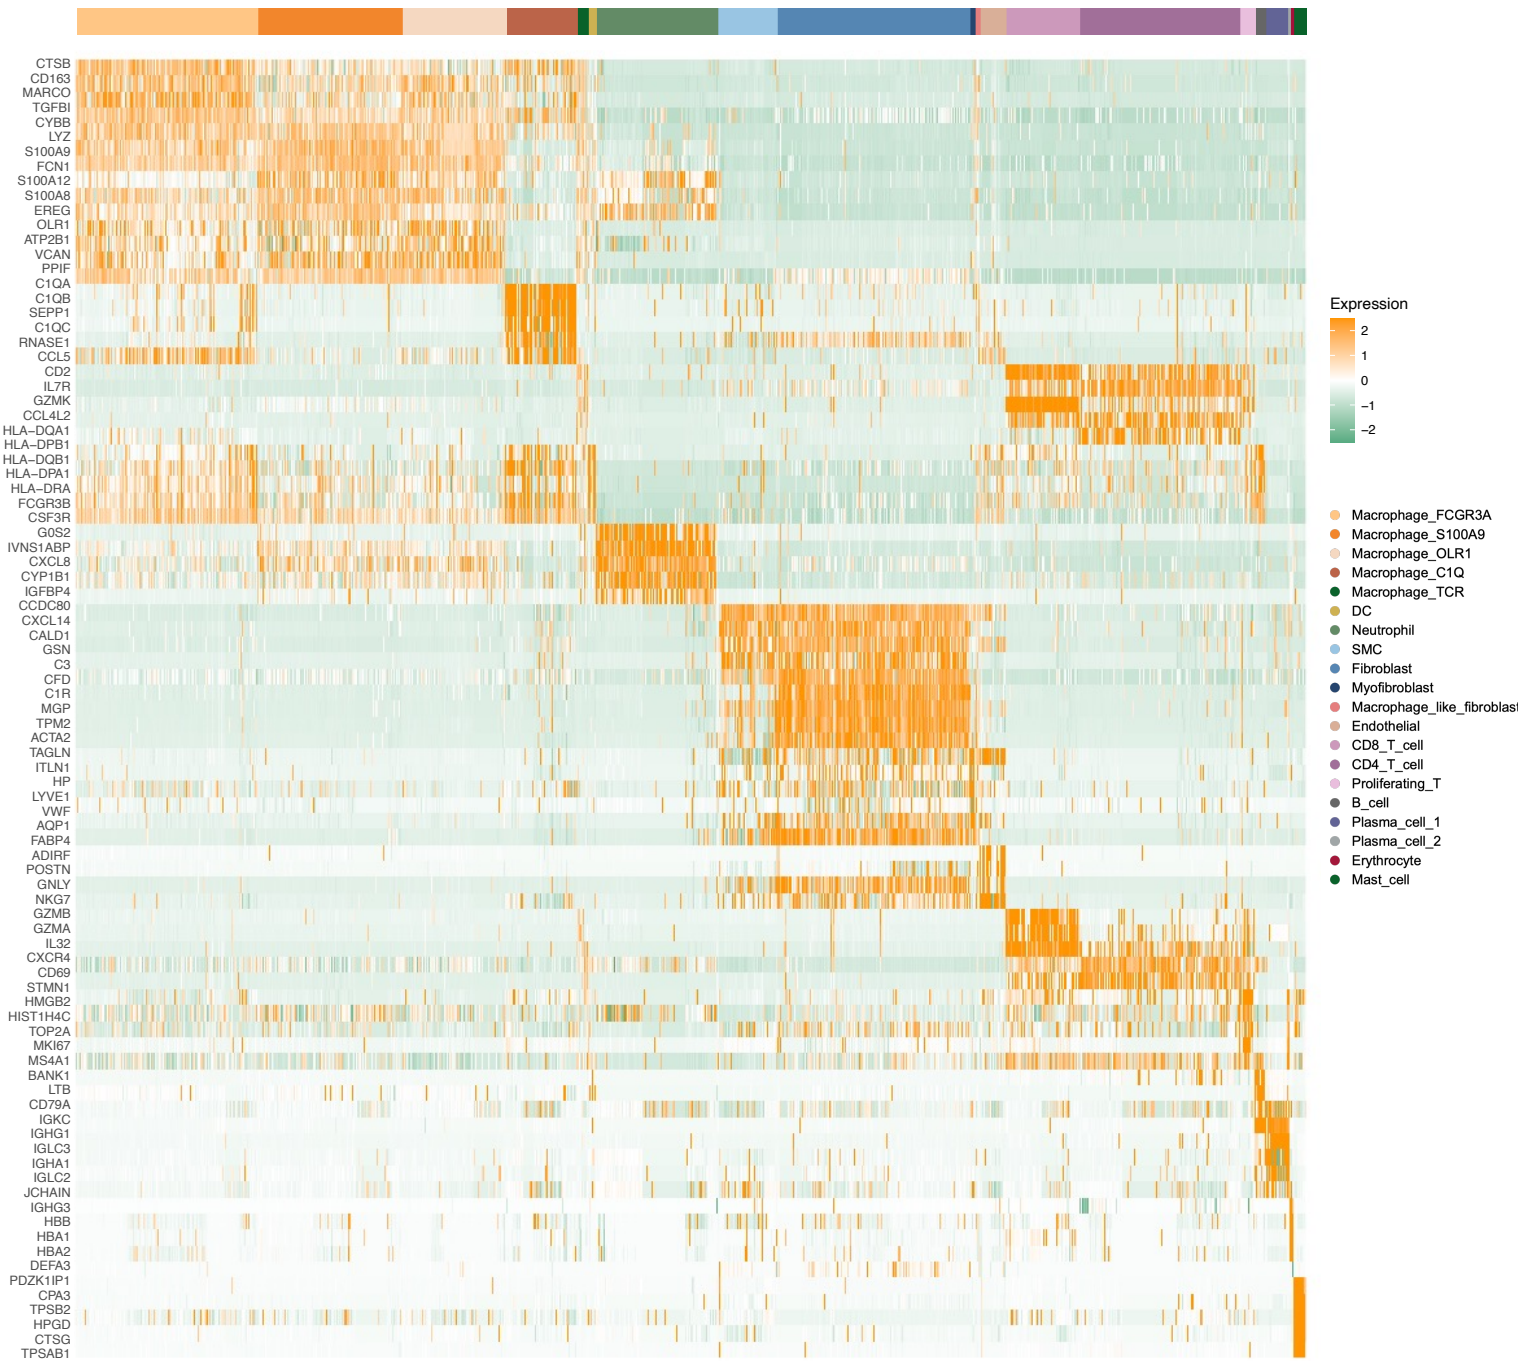

B

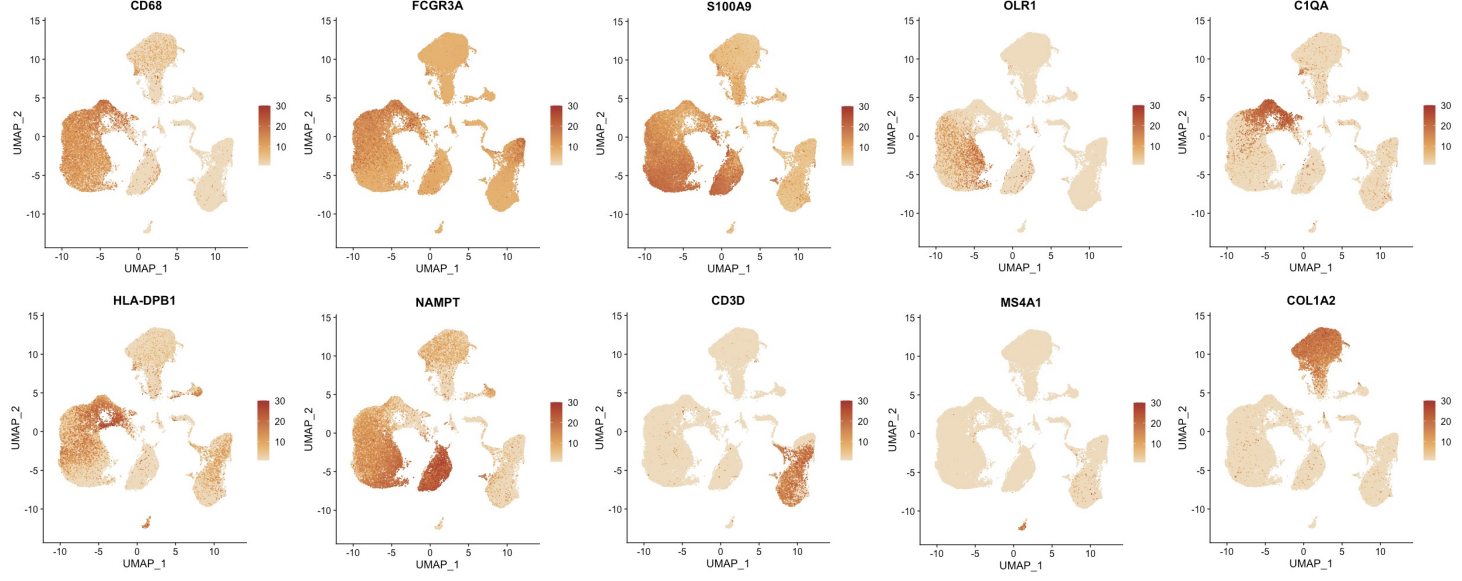

10 **Supplementary Figure 2. Single-cell transcriptomic analyses show cell populations**  
11 **with expression patterns in aortic lesions in AD.** (A) Heatmap showing the most  
12 upregulated genes (ordered by decreasing p-value) in each cluster and selected enriched  
13 genes used for biological identification of each cluster (Scale: log<sub>2</sub> fold change). (B) Log-  
14 transformed gene expression patterns projected onto UMAP plots of CD68, FCGR3A,  
15 S100A9, OLR1, C1QA, HLA-DPB1, NAMPT, CD3D, MS4A1, and COL1A2.

16

# SFigure 3

A

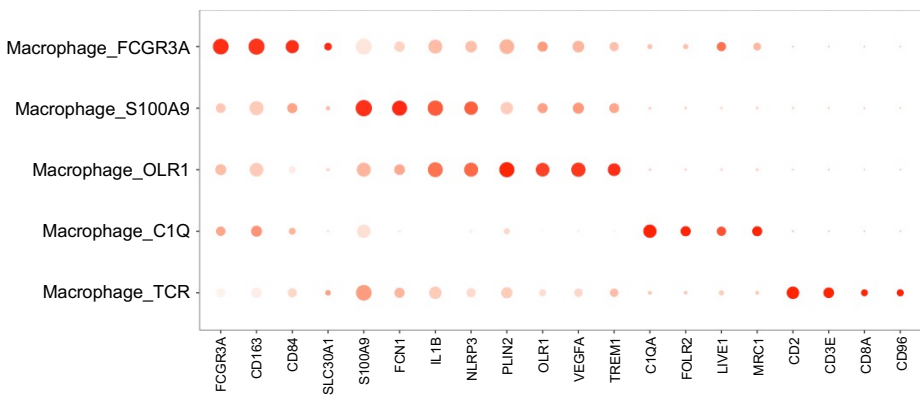

B

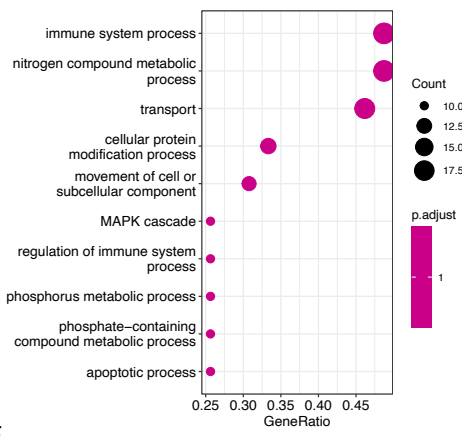

C

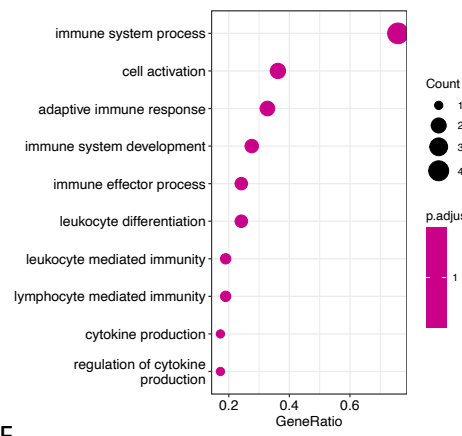

D

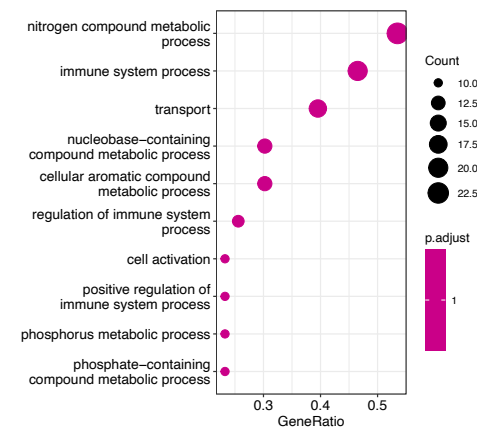

E

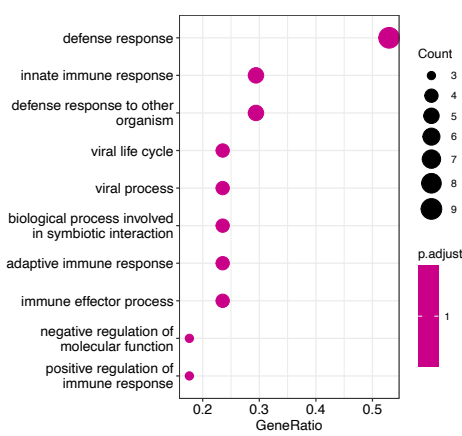

F

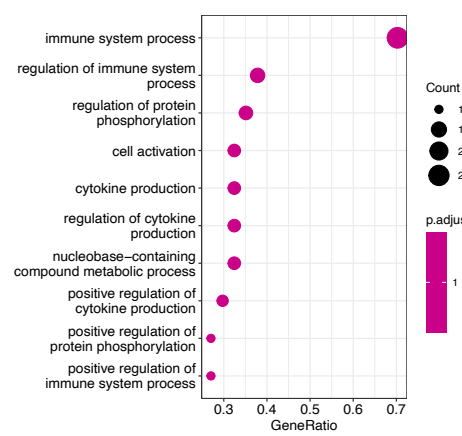

G

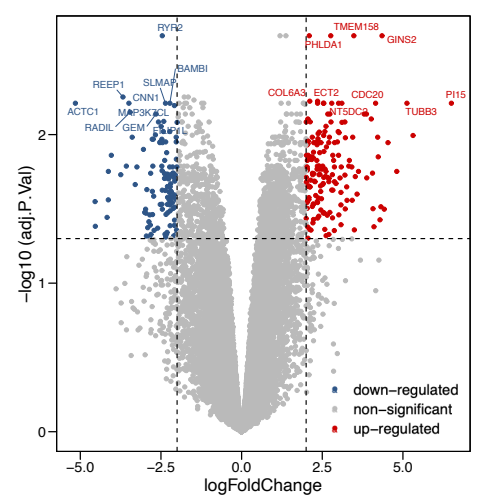

H

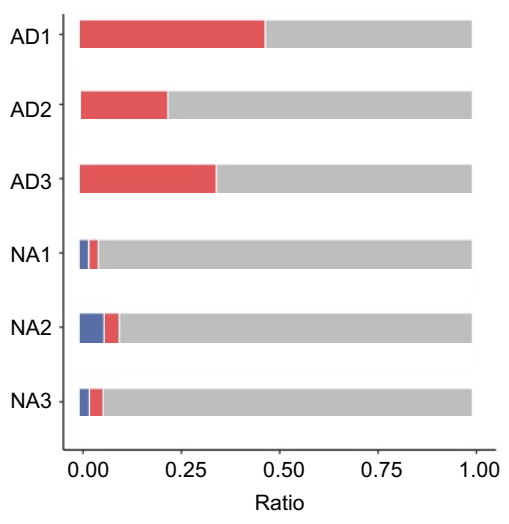

17 **Supplementary Figure 3. Single-cell transcriptomic analyses show cell populations**  
18 **with putative functions in aortic lesions in AD.** (A) Dotplot of log-transformed gene  
19 expression of selected genes showing statistically significant upregulation in inflammatory  
20 macrophages (Macrophage\_FCGR3A), atherosclerosis-like macrophages  
21 (Macrophage\_OLR1), MDSCs-like macrophages (Macrophage\_S100A9), tissue resident  
22 macrophages (Macrophage\_C1Q), TCR<sup>+</sup> macrophages (Macrophage\_TCR). (B) Gene  
23 ontology enrichment analysis of biological processes in FCGR3A<sup>+</sup> macrophages in single-  
24 cell sequencing data. (C) Gene ontology enrichment analysis of biological processes in  
25 MDSCs-like macrophages in single-cell sequencing data. (D) Gene ontology enrichment  
26 analysis of biological processes in OLR1<sup>+</sup> macrophages in single-cell sequencing data. (E)  
27 Gene ontology enrichment analysis of biological processes in tissue resident macrophages  
28 in single-cell sequencing data. (F) Gene ontology enrichment analysis of biological  
29 processes in TCR<sup>+</sup> macrophages in single-cell sequencing data. (G) Volcano plot shows  
30 the differentially expressed genes between patients with AD ( $n = 7$ ) and healthy individuals  
31 ( $n = 5$ ) from a publicly available bulk RNA-seq dataset (GSE52093). (H) Histogram  
32 indicates the proportion of Scissor-selected cells in aortic tissue of each analyzed patient  
33 with AD ( $n = 3$ ) and healthy individual ( $n = 3$ ). A two-sided statistical significance was set  
34 at adjusted  $p < 0.05$ . **AD**: aortic dissection; **FCGR3A**: Fc fragment of IgG receptor 3a;  
35 **MDSCs**: myeloid-derived suppressor cells; **S100A9**: S100 calcium binding protein A9;  
36 **OLR1**: oxidized low density lipoprotein receptor 1.

# SFigure 4

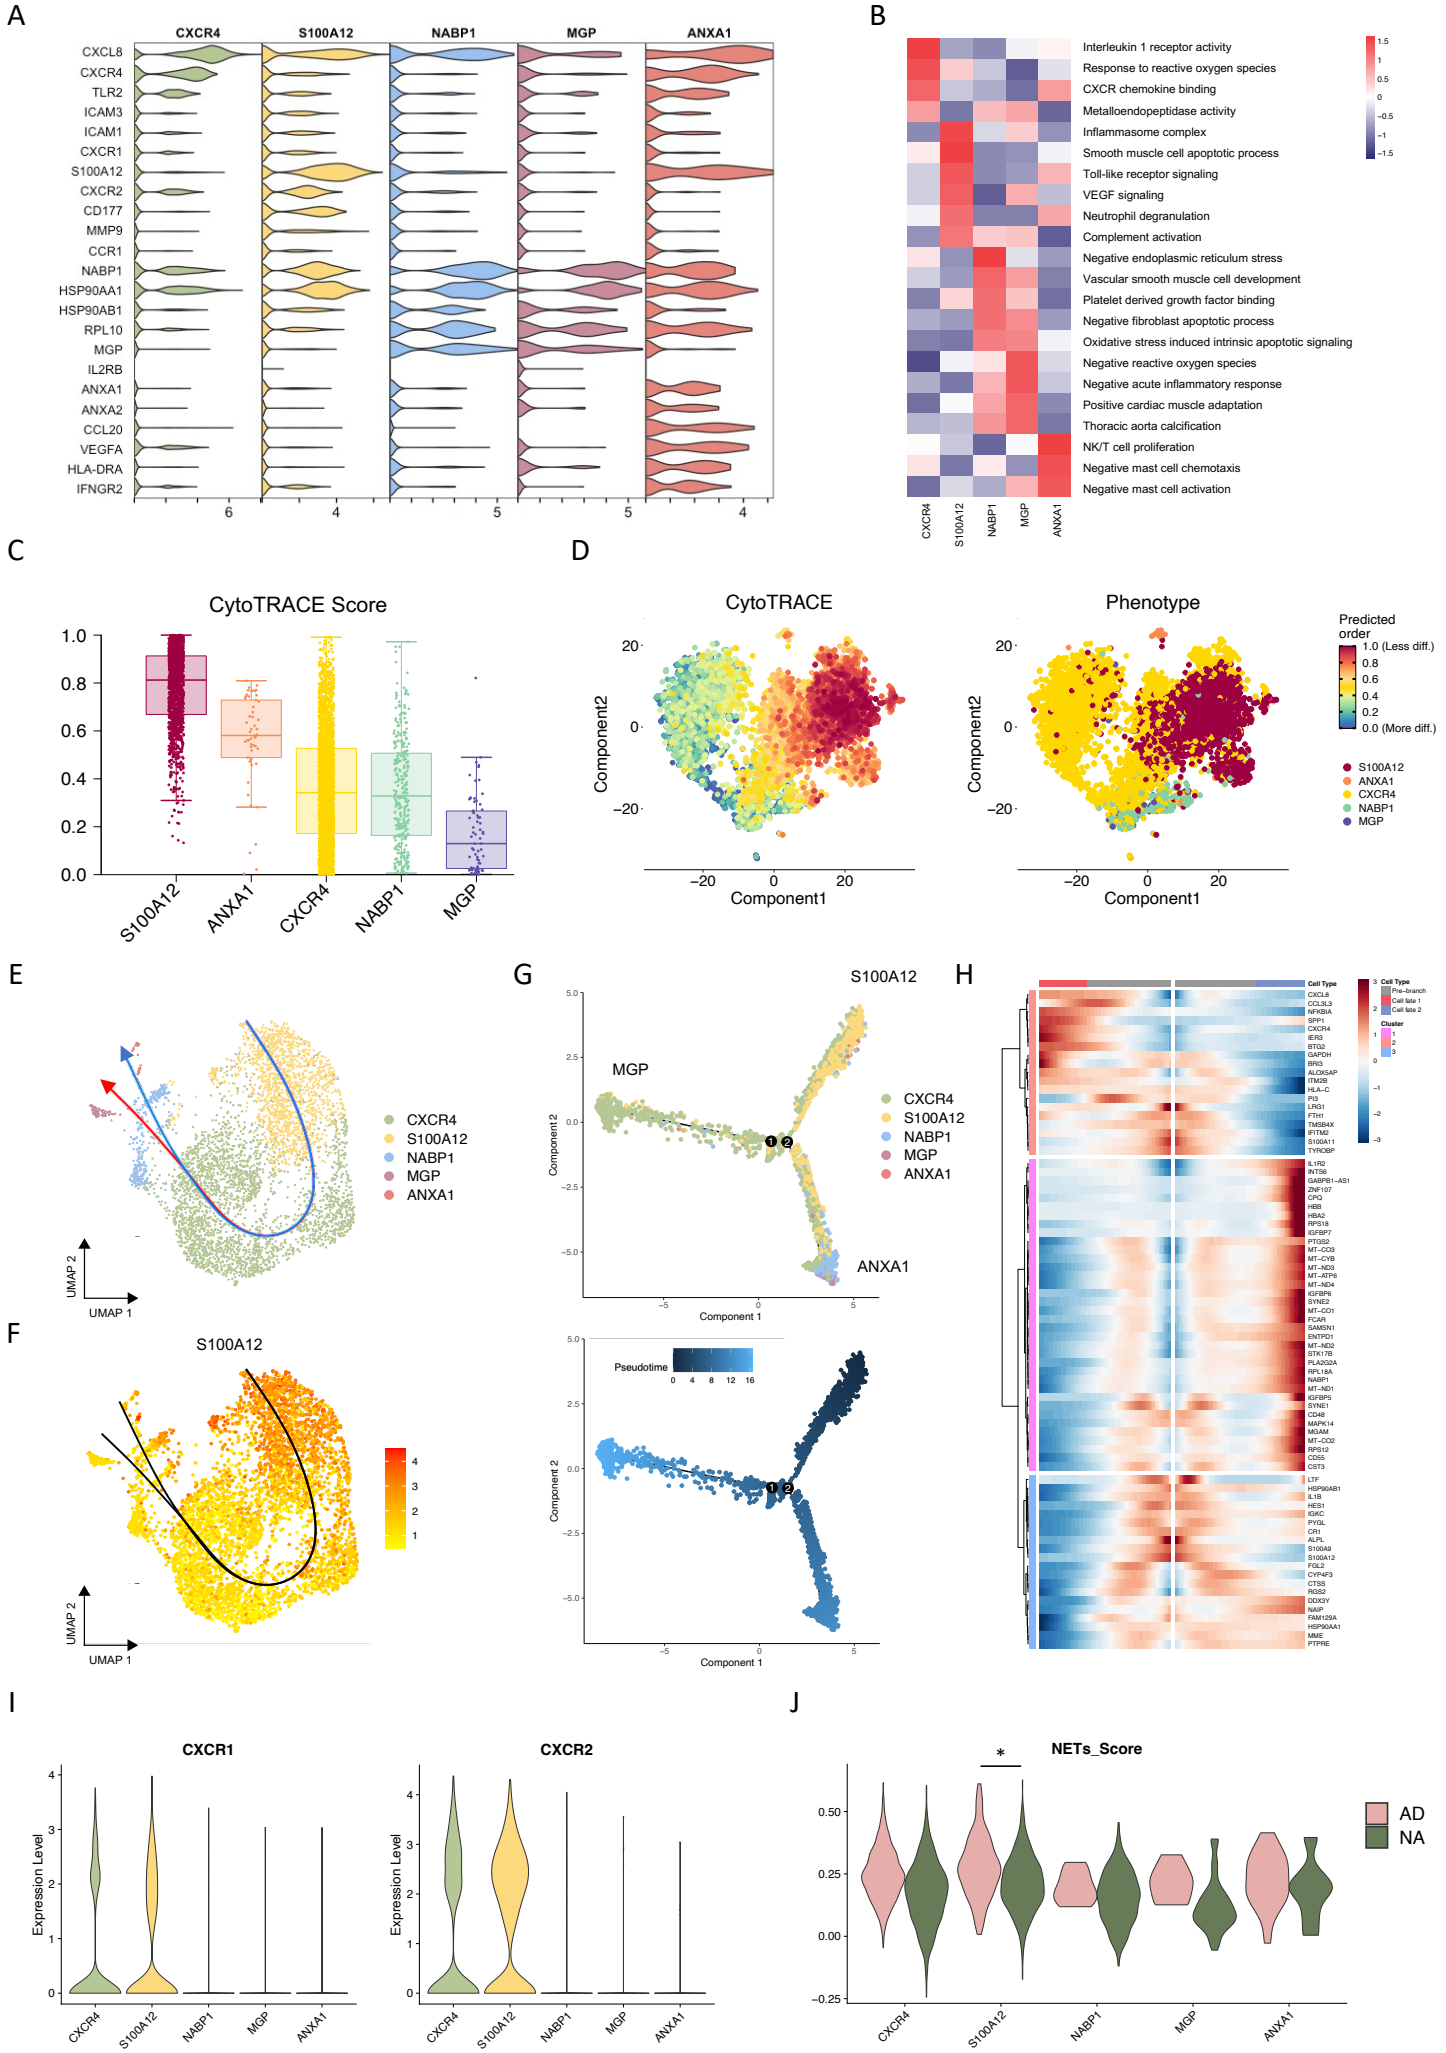

37 **Supplementary Figure 4. Neutrophil heterogeneity and differentiation trajectories.**

38 (A) Violin plot showing the expression levels of markers of each subset. (B) Heatmap  
39 showing the scale normalized gene set enrichment analysis (GSVA) scores for select Gene  
40 Ontology pathways in each neutrophil subset. (C) Boxplot showing the comparison of  
41 CytoTRACE score among different neutrophil subsets. (D) Cell differentiation ordered by  
42 CytoTRACE score projected on UMAP plot. (E) Neutrophil subsets projected on UMAP  
43 plot with bifurcating differentiation trajectories by Slingshot (red and blue smooth lines).  
44 (F) The expression of S100A12 in neutrophil subsets projected on UMAP plot. (G-H)  
45 trajectory and heatmap of neutrophils with markers by Monocle. (I) Violin plot showing  
46 the expression of CXCR1 and CXCR2. (J) NETs-associated gene module score of  
47 neutrophil subsets in AD and normal aortas.

48



# SFigure 5

**A**

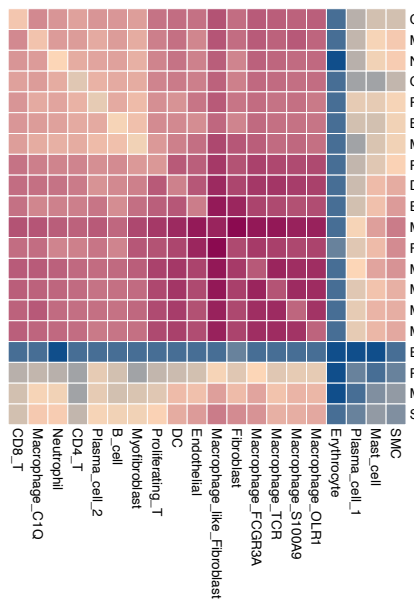

**B**

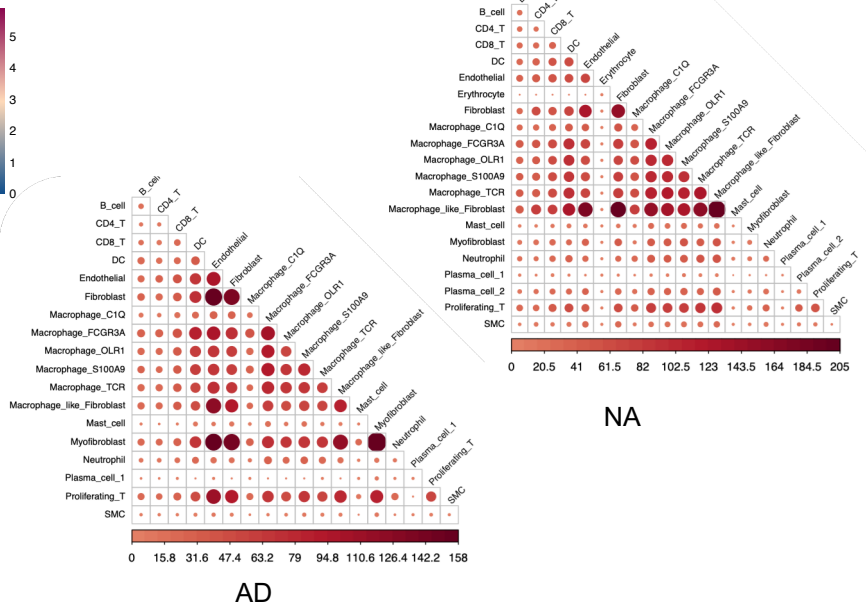

**C**

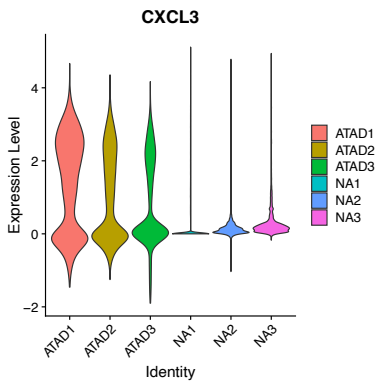

**D**

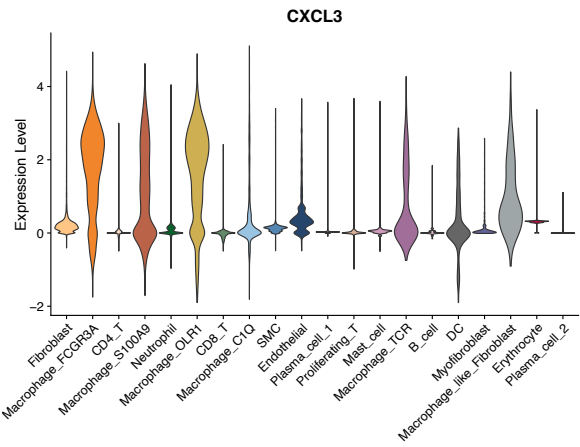

**E**

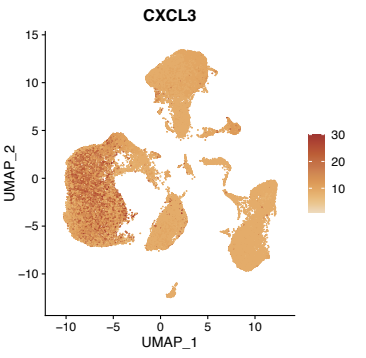

**F**

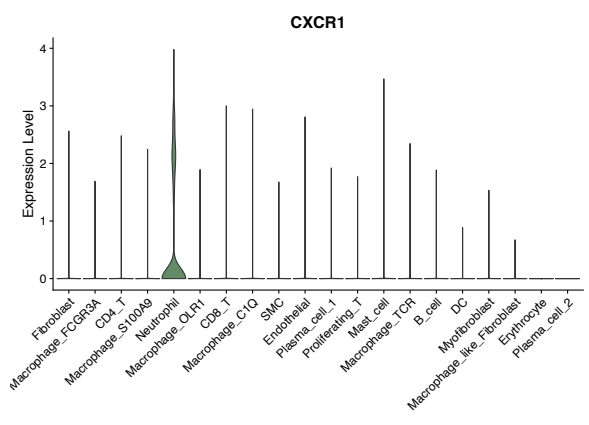

**G**

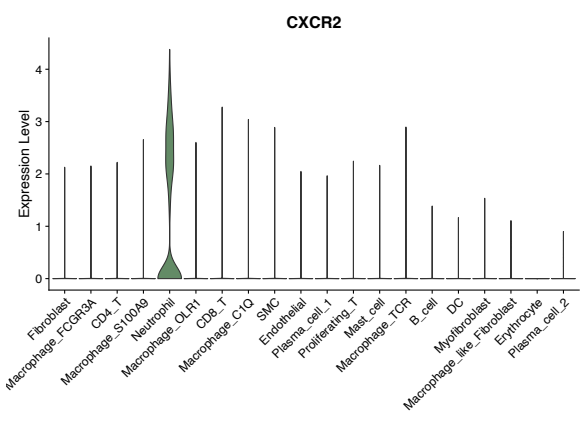

49 **Supplementary Figure 5. Cell-cell interactions in aortic lesions in AD.** (A) Cellphone  
50 DB analysis shows the number of ligand-receptor interactions between all cell populations.  
51 (B) Cellphone DB analysis shows the difference of number of ligand-receptor interactions  
52 between all cell populations across patients with AD and healthy individuals. (C) Violin  
53 plot showing the expression level of CXCL3 between patients with AD and healthy  
54 individuals. (D) Violin plot showing the expression level of CXCL3 among all cell  
55 populations. (E) The expression level of CXCL3 projected on UMAP plot. (F) Violin plot  
56 showing the expression level of CXCR1 among all cell populations. (G) Violin plot  
57 showing the expression level of CXCR2 among all cell populations. A two-sided statistical  
58 significance was set at adjusted  $p < 0.05$ .

# SFigure 6

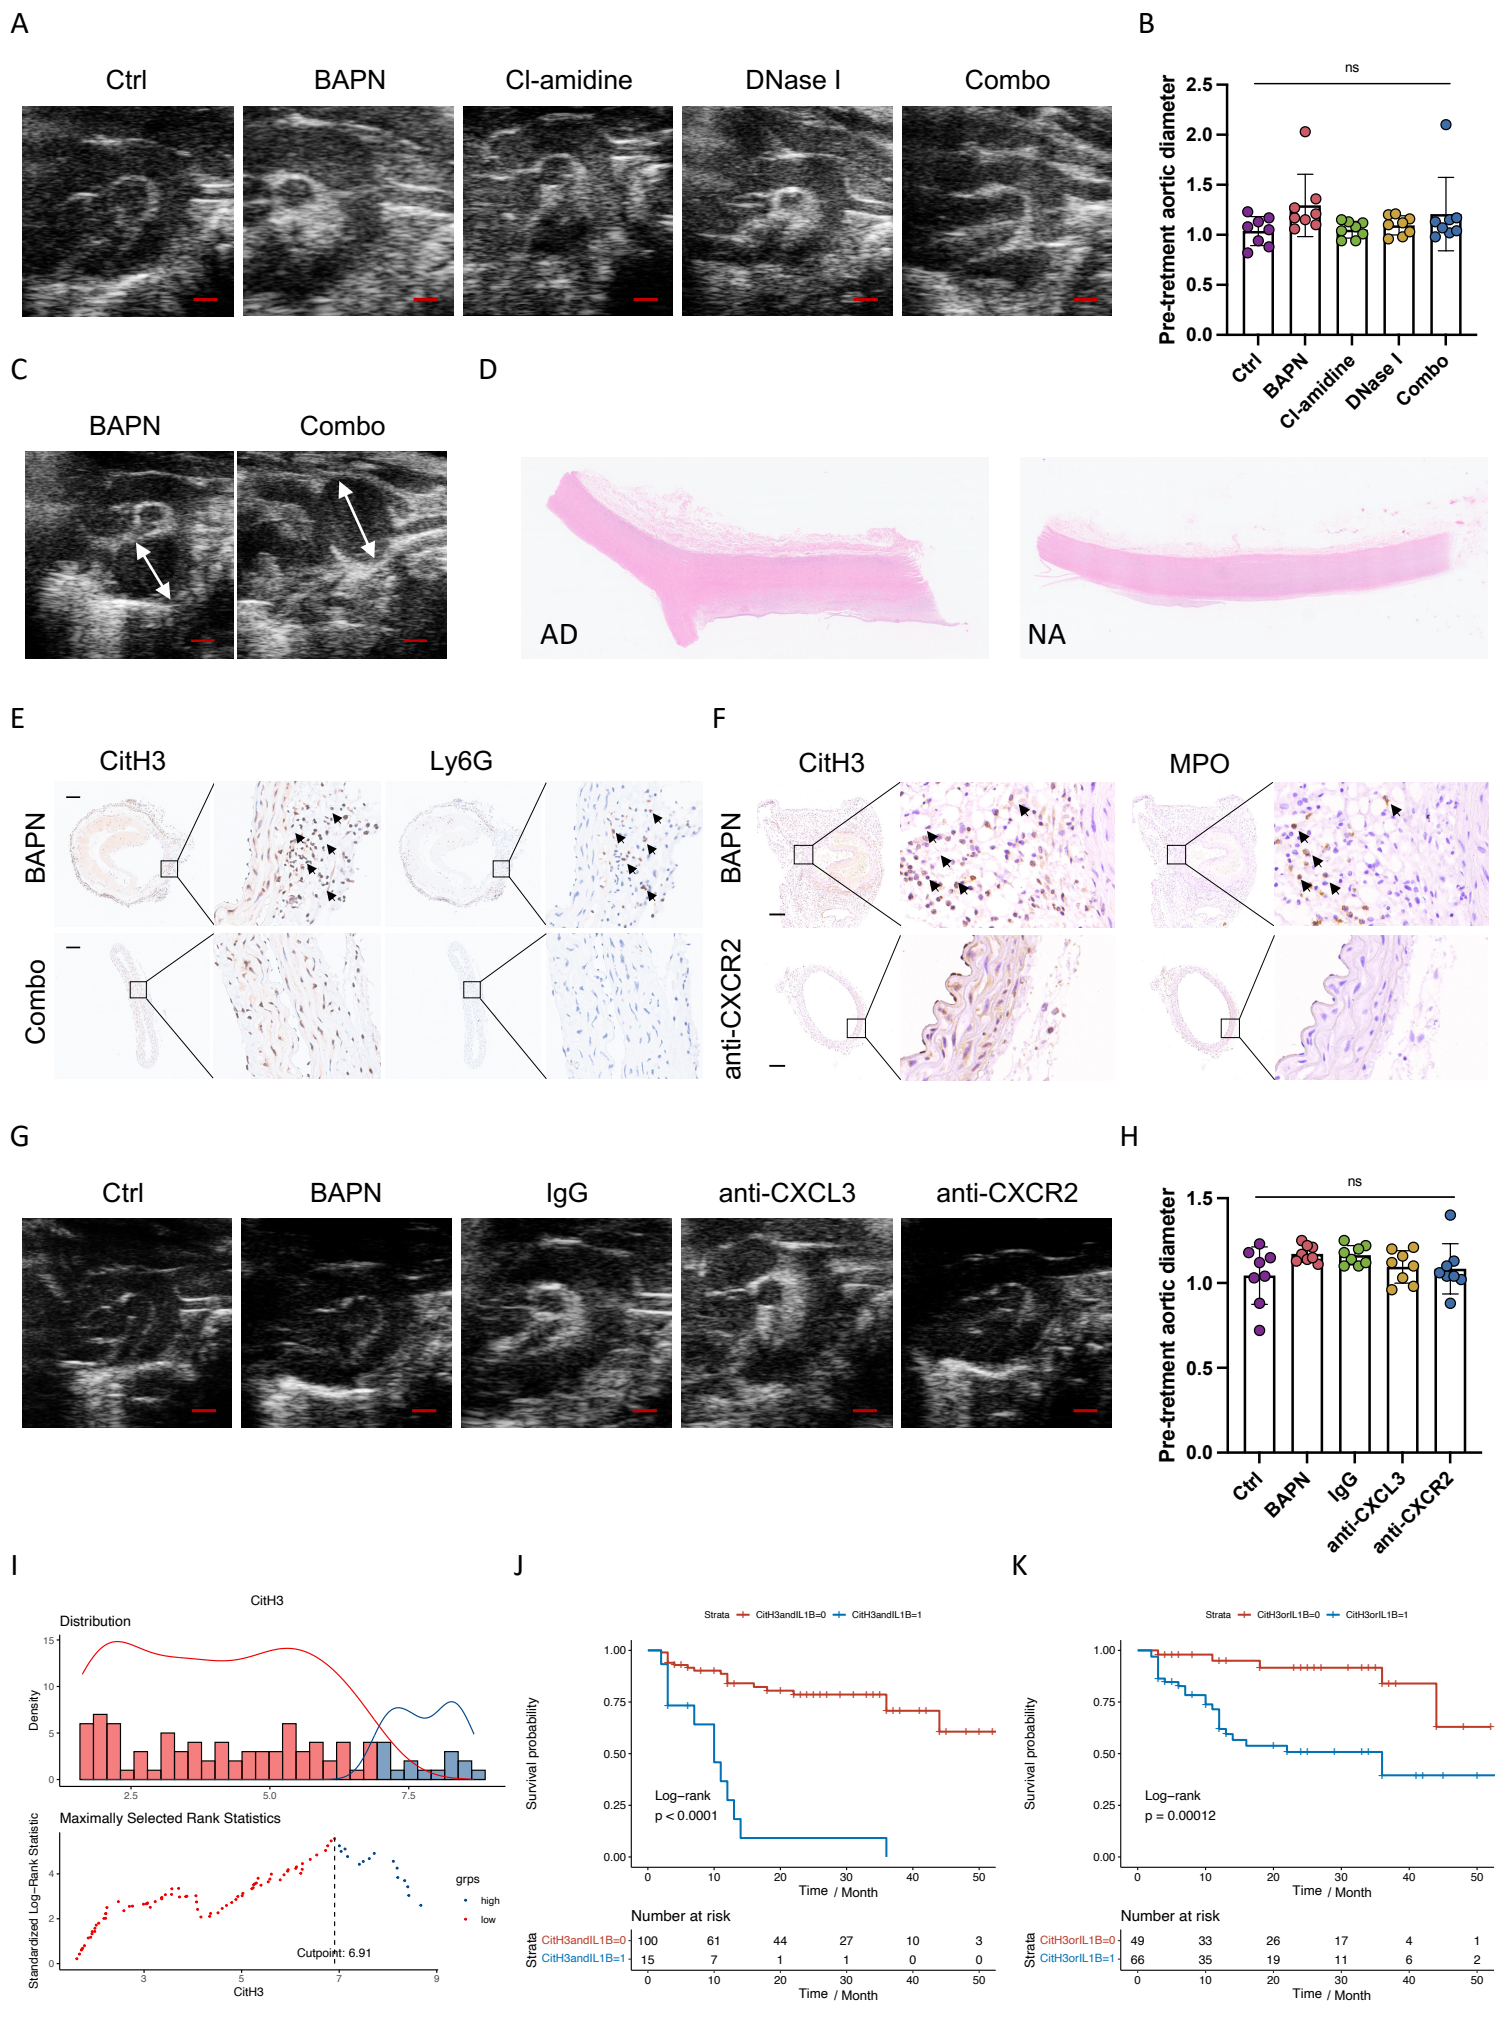

59 **Supplementary Figure 6. Inhibition of NETs attenuates dissection progression in mice**  
60 **with AD.** (A) Representative pre-treatment vascular ultrasound images of aorta in each  
61 group. Scale bar = 1 mm. (B) Baseline aortic diameters of each mouse measured by  
62 vascular ultrasound at day 7 before the administration of NETs inhibitors. (C)  
63 Representative images of two mice with enlarged section located in proximal descending  
64 aorta (indicated by white arrow) in BAPN and combination treatment groups. Scale bar =  
65 1 mm. (D) The H&E images show the longitudinal section of dissected and normal aortas.  
66 H&E: hematoxylin and eosin. (E-F) The immunohistochemistry images showing NETs  
67 formation within aortas in mice with BAPN and NETs inhibition, determined by staining  
68 of CitH3 and Ly6G, and CitH3 and MPO, respectively. Scale bar = 100  $\mu$ m. (G)  
69 Representative pre-treatment vascular ultrasound images of aorta in each group. Scale bar  
70 = 1 mm. (H) Baseline aortic diameters of each mouse measured by vascular ultrasound at  
71 day 7 before the administration of anti-CXCL3 and anti-CXCR2 antibodies. (I) The  
72 maximally selected log-rank statistic indicates the cut-off value of CitH3 level. (J) Kaplan-  
73 Meier curves of patients with both high CitH3 ( $\geq 6.91$  ng/ml) and high IL-1 $\beta$  ( $\geq 90.86$   
74 pg/ml) compared to remaining patients. Below the survival curves showing the number of  
75 exposed subjects at each time point. (K) Kaplan-Meier curves of patients with either high  
76 CitH3 ( $\geq 6.91$  ng/ml) or high IL-1 $\beta$  ( $\geq 90.86$  pg/ml). Below the survival curves showing  
77 the number of exposed subjects at each time point. \* $p < 0.05$ , \*\* $p < 0.01$ , \*\*\* $p < 0.001$ ,  
78 \*\*\*\* $p < 0.0001$  by Mann-Whitney U test.

79

80 **Supplementary Table 1. Baseline characteristics of patients with AD and healthy**  
 81 **individuals involved in mass spectrometry.**

|                                  | AD (N = 30)  | CL (N = 30)  | P-value             |
|----------------------------------|--------------|--------------|---------------------|
| Age (y)                          | 57.1 ± 12.0  | 52.8 ± 8.1   | 0.113 <sup>†</sup>  |
| Gender                           |              |              | 1 <sup>‡</sup>      |
| M                                | 27 (90.0%)   | 27 (90.0%)   |                     |
| F                                | 3 (10.0%)    | 3 (10.0%)    |                     |
| Hypertension                     | 21 (70.0%)   | 0            | < .001 <sup>‡</sup> |
| Smoking                          | 11 (36.7%)   | 0            | < .001 <sup>‡</sup> |
| Diabetes mellitus                | 5 (16.7%)    | 0            | 0.052 <sup>‡</sup>  |
| Alcohol abuse                    | 13 (53.3%)   | 0            | < .001 <sup>‡</sup> |
| Stroke                           | 2 (6.7%)     | 0            | 0.491 <sup>‡</sup>  |
| Coronary heart disease           | 6 (20%)      | 0            | 0.023 <sup>‡</sup>  |
| Chronic kidney disease           | 0            | 0            | 1 <sup>‡</sup>      |
| Neutrophil (×10 <sup>9</sup> /L) | 7.0 ± 2.1    | 3.8 ± 0.8    | < .001 <sup>†</sup> |
| Monocyte (×10 <sup>9</sup> /L)   | 0.8 ± 0.4    | 0.6 ± 0.6    | 0.189 <sup>†</sup>  |
| Lymphocyte (×10 <sup>9</sup> /L) | 1.3 ± 0.5    | 2.0 ± 0.9    | 0.006 <sup>†</sup>  |
| Platelet (×10 <sup>9</sup> /L)   | 234.9 ± 93.5 | 259.9 ± 54.4 | 0.260 <sup>†</sup>  |
| D-dimer (mg/L)                   | 5.1 ± 5.2    | 0.2 ± 0.1    | < .001 <sup>†</sup> |
| ALT (U/L)                        | 29.7 ± 38.4  | 34.8 ± 16.9  | 0.542 <sup>†</sup>  |
| AST (U/L)                        | 23.1 ± 19.8  | 27.7 ± 7.3   | 0.272 <sup>†</sup>  |
| Cholesterol (mmol/L)             | 4.7 ± 1.0    | 5.2 ± 0.6    | 0.115 <sup>†</sup>  |
| Triglyceride (mmol/L)            | 1.2 ± 0.4    | 1.9 ± 0.6    | 0.001 <sup>†</sup>  |

82 <sup>†</sup> Mann-Whitney test

83 <sup>‡</sup> Fisher's exact test

84 Values are expressed as means ± SD.

85 **ALT:** Alanine transaminase; **AST:** Aspartate aminotransferase.

86

87

88 **Supplementary Table 2. Baseline characteristics of patients with AD and healthy**  
 89 **individuals in diagnostic cohort.**

|                                  | AD (N = 187) | CL (N = 59)  | P-value |
|----------------------------------|--------------|--------------|---------|
| Gender                           |              |              | <.001‡  |
| M                                | 29 (15.5%)   | 27 (45.8%)   |         |
| F                                | 158 (84.5%)  | 32 (54.2%)   |         |
| Age                              | 56.6 ± 13.6  | 46.7 ± 14.6  | <.001†  |
| D-dimer                          | 4.5 ± 5.2    | 3.6 ± 5.1    | 0.227†  |
| WBC (×10 <sup>9</sup> /L)        | 7.5 ± 4.4    | 7.3 ± 1.8    | 0.459†  |
| Neutrophil (×10 <sup>9</sup> /L) | 6.4 ± 2.6    | 4.4 ± 2.2    | <.001†  |
| Monocyte (×10 <sup>9</sup> /L)   | 0.8 ± 0.8    | 0.4 ± 0.2    | <.001†  |
| Lymphocyte (×10 <sup>9</sup> /L) | 1.3 ± 0.5    | 2.4 ± 0.6    | <.001†  |
| Platelet (×10 <sup>9</sup> /L)   | 202.3 ± 71.1 | 255.7 ± 65.2 | <.001†  |
| Albumin (g/L)                    | 40.7 ± 4.8   | 46.2 ± 2.7   | <.001†  |
| Creatinine (µmol/L)              | 91.9 ± 92.2  | 74.0 ± 17.2  | 0.012†  |
| GFR (ml/min)                     | 71.3 ± 32.6  | 81.3 ± 30.0  | 0.038†  |
| Cholesterol (mmol/L)             | 4.1 ± 1.1    | 4.8 ± 1.0    | <.001†  |
| Triglyceride (mmol/L)            | 1.4 ± 0.9    | 1.5 ± 1.4    | 0.646†  |
| LDL (mmol/L)                     | 2.3 ± 0.8    | 3.2 ± 0.9    | <.001†  |
| HDL (mmol/L)                     | 1.4 ± 0.9    | 1.2 ± 0.3    | 0.010†  |
| CRP (mg/L)                       | 56.5 ± 52.7  | 45.7 ± 49.2  | 0.165†  |
| CitH3 (ng/mL)                    | 4.4 ± 3.0    | 1.8 ± 1.3    | <.001†  |
| cf-DNA (ng/mL)                   | 2.0 ± 0.7    | 1.7 ± 0.6    | 0.006†  |
| MPO (ng/mL)                      | 4.4 ± 2.5    | 2.8 ± 1.7    | <.001†  |
| NE (ng/mL)                       | 4.1 ± 1.9    | 2.2 ± 1.3    | <.001†  |
| IL-1β (pg/mL)                    | 94.2 ± 29.0  | 86.6 ± 26.7  | 0.074†  |
| IL-6 (pg/mL)                     | 45.2 ± 19.7  | 37.7 ± 17.4  | 0.010†  |
| Hypertension                     | 146 (78.1%)  | 3 (1.6%)     | <.001‡  |
| Smoking                          | 106 (56.7%)  | 3 (1.6%)     | <.001‡  |
| Alcohol abuse                    | 80 (42.8%)   | 3 (1.6%)     | <.001‡  |
| Diabetes mellitus                | 75 (40.1%)   | 3 (1.6%)     | <.001‡  |
| Coronary heart disease           | 8 (4.3%)     | 0            | 0.204‡  |
| Stroke                           | 1 (0.5%)     | 0            | 1‡      |
| Chronic kidney disease           | 8 (4.3%)     | 0            | 0.204‡  |

90 † Mann-Whitney test

91 ‡ Fisher's exact test

92 Values are expressed as means ± SD.

93 **WBC:** White blood cell; **GFR:** Glomerular filtration rate; **LDL:** Low density lipoprotein;

94 **HDL:** High density lipoprotein; **CRP:** C-reactive protein; **CitH3:** citrullinated histone H3;

95 **cf-DNA:** cell free-DNA; **MPO:** myeloperoxidase; **NE:** Neutrophil elastase.

96

97 **Supplementary Table 3. LASSO and multivariable logistic regression analyses of**  
 98 **patients with AD and healthy individuals in diagnostic cohort.**

|            | OR (95% CI)       | P-value |
|------------|-------------------|---------|
| Gender     | 1.98 (0.37-10.75) | .416    |
| Age        | 1.01 (0.96-1.07)  | .638    |
| Neutrophil | 0.75 (0.53-1.03)  | .079    |
| Monocyte   | 7.36 (1.71-9.67)  | < .001  |
| Lymphocyte | 0.79 (0.10-0.89)  | < .001  |
| Platelet   | 0.99 (0.98-1.01)  | .325    |
| LDL        | 0.41 (0.18-0.87)  | .025    |
| HDL        | 1.03 (0.42-4.10)  | .952    |
| CRP        | 1.00 (0.99-1.01)  | .976    |
| CitH3      | 2.02 (1.39-3.38)  | .002    |
| cf-DNA     | 0.84 (0.22-3.20)  | .791    |

99 **LDL:** Low density lipoprotein; **HDL:** High density lipoprotein; **CRP:** C-reactive protein;  
 100 **CitH3:** citrullinated histone H3; **cf-DNA:** cell free-DNA.

101

102

103 **Supplementary Table 4. Baseline characteristics of patients with AD receiving**  
 104 **TEVAR in predicting AAEs.**

|              | non-AAEs (N=85) | AAEs (N=31)    | P-value            |
|--------------|-----------------|----------------|--------------------|
| Age          | 56.2 ± 13.7     | 54.0 ± 14.5    | 0.468 <sup>†</sup> |
| Gender       |                 |                | 0.077 <sup>‡</sup> |
| Female       | 12 (14.1%)      | 10 (32.3%)     |                    |
| Male         | 72 (84.7%)      | 21 (67.7%)     |                    |
| Phase        |                 |                | 0.328 <sup>‡</sup> |
| Acute        | 70 (82.4%)      | 22 (71%)       |                    |
| Subacute     | 9 (10.6%)       | 4 (12.9%)      |                    |
| Chronic      | 4 (4.7%)        | 2 (6.5%)       |                    |
| D-dimer      | 4.5 ± 5.1       | 7.2 ± 7.0      | 0.056 <sup>†</sup> |
| Neutrophil   | 6.3 ± 2.6       | 7.2 ± 2.4      | 0.088 <sup>†</sup> |
| Monocyte     | 0.7 ± 0.3       | 0.7 ± 0.3      | 0.413 <sup>†</sup> |
| Lymphocyte   | 1.3 ± 0.4       | 1.2 ± 0.4      | 0.366 <sup>†</sup> |
| Platelet     | 211.4 ± 79.5    | 192.1 ± 70.8   | 0.238 <sup>†</sup> |
| Albumin      | 40.5 ± 4.4      | 40.5 ± 3.5     | 0.970 <sup>†</sup> |
| Cholesterol  | 4.1 ± 1.2       | 4.1 ± 0.7      | 0.734 <sup>†</sup> |
| Triglyceride | 1.4 ± 0.9       | 1.1 ± 0.5      | 0.036 <sup>†</sup> |
| LDL          | 2.2 ± 0.8       | 2.4 ± 0.6      | 0.101 <sup>†</sup> |
| HDL          | 1.5 ± 1.1       | 1.3 ± 0.9      | 0.267 <sup>†</sup> |
| NLR          | 5.0 ± 3.2       | 6.2 ± 3.4      | 0.086 <sup>†</sup> |
| PLR          | 166.8 ± 66.3    | 179.7 ± 69.8   | 0.362 <sup>†</sup> |
| MLR          | 4.3 ± 3.0       | 5.0 ± 2.4      | 0.234 <sup>†</sup> |
| SII          | 1014.1 ± 702.5  | 1163.4 ± 572.1 | 0.291 <sup>†</sup> |
| SIRI         | 0.6 ± 0.2       | 0.7 ± 0.3      | 0.018 <sup>†</sup> |
| CitH3        | 4.3 ± 2.4       | 6.9 ± 3.2      | <.001 <sup>†</sup> |
| cf-DNA       | 2.0 ± 0.6       | 2.0 ± 0.7      | 0.650 <sup>†</sup> |
| MPO          | 4.8 ± 2.3       | 6.0 ± 2.5      | 0.020 <sup>†</sup> |
| NE           | 4.1 ± 1.9       | 4.2 ± 1.7      | 0.834 <sup>†</sup> |
| IL-1β        | 94.9 ± 29.1     | 93.0 ± 26.8    | 0.755 <sup>†</sup> |
| IL-6         | 43.8 ± 20.0     | 43.5 ± 17.6    | 0.946 <sup>†</sup> |

105 <sup>†</sup> Mann-Whitney test

106 <sup>‡</sup> Fisher's exact test

107 Values are expressed as means ± SD.

108 **LDL**: Low density lipoprotein; **HDL**: High density lipoprotein; **NLR**: Neutrophil-to-  
 109 lymphocyte ratio; **MLR**: Monocyte-to-lymphocyte ratio; **PLR**: Platelet-to-lymphocyte  
 110 ratio; **SII**: Systemic immune inflammation index; **SIRI**: Systemic inflammatory response  
 111 index; **CitH3**: citrullinated histone H3; **cf-DNA**: cell free-DNA; **MPO**: myeloperoxidase;  
 112 **NE**: Neutrophil elastase.

113



114 **Supplementary Table 5. Univariable and multivariable Cox proportional hazard**  
 115 **regression analyses of patients receiving TEVAR in predicting AAEs.**

|            | Univariable        |         | Multivariable       |         |
|------------|--------------------|---------|---------------------|---------|
|            | HR (95% CI)        | P-value | HR (95% CI)         | P-value |
| D-dimer    | 1.04 (1.00-1.09)   | .049    | 1.02 (0.97-1.07)    | .510    |
| Neutrophil | 1.17 (1.03-1.33)   | .017    | 1.13 (0.95-1.35)    | .174    |
| NLR        | 1.13 (1.04-1.22)   | .004    | 1.07 (0.87-1.30)    | .524    |
| MLR        | 1.14 (1.04-1.25)   | .007    | 0.89 (0.68-1.16)    | .379    |
| SIRI       | 15.33 (3.82-61.53) | .001    | 14.23 (1.82-111.31) | .011    |
| CitH3      | 1.24 (1.11-1.37)   | < .001  | 1.18 (1.05-1.33)    | .004    |
| MPO        | 1.18 (1.01-1.39)   | .036    | 1.02 (0.84-1.23)    | .847    |

116 **NLR:** Neutrophil-to-lymphocyte ratio; **MLR:** Monocyte-to-lymphocyte ratio; **SIRI:**  
 117 **Systemic inflammatory response index; CitH3:** citrullinated histone H3; **MPO:**  
 118 **myeloperoxidase.**

119  
 120  
 121
